# Supplementary material for: Improving Self-Monitoring of Blood Glucose among Adults with Type 1 Diabetes: Results of the Mobile™ Study
Source: PubMed Central journal article supplement — Diabetes Ther. 2014 Dec 11;5(2):557–65. doi: 10.1007/s13300-014-0092-9 (PMC4269644; doi:10.1007/s13300-014-0092-9), 2014-12-11
Supplement: 13300_2014_92_MOESM1_ESM.pdf [file 13300_2014_92_MOESM1_ESM.pdf]

- Self-monitoring of blood glucose (SMBG) frequency is associated with better control in type 1 diabetes; despite this only a small proportion of patients achieve the recommended frequency.
- We performed a randomized controlled trial of the Accu-Chek Mobile™ (F. Hoffmann-La Roche AG, Basel, Switzerland) system - a strip-less SMBG device - compared to the strip-based Freestyle Optium™ (Abbott, North Chicago, IL, USA) system in a cross-over design.
- Primary outcome measure was SMBG frequency; secondary outcomes included: glycemic control, diabetes treatment satisfaction, confidence in treating diabetes, and diabetes distress.
- SMBG frequency increased in both groups but participants monitored significantly more often using the Accu-Chek Mobile meter (SMBG/week median: 19 vs. 10;  $P = 0.04$ ); after 3 months using each meter, 77% of participants indicated a preference for the Accu-Chek Mobile meter and monitoring frequency in this group remained higher than baseline during the three-month post-cross-over follow-up period.
- Our results indicate that the Accu-Chek Mobile meter improves SMBG frequency.

This summary slide represents the opinions of the authors. Sponsorship for this study was funded by Roche. For a full list of acknowledgments and conflicts of interest for all authors of this article, please see the full text online. Copyright © The Author(s) 2014. Creative Commons Attribution Noncommercial License (CC BY-NC).
